# Supplementary material for: miR-539 acts as a tumor suppressor by targeting epidermal growth factor receptor in breast cancer
Source: PubMed Central journal article supplement (PMC5794864; doi:10.1038/s41598-018-20431-z), 2018-02-01

**Tumour-suppressive miR-539 inhibits tumour cell growth and migration by directly targeting EGFR in breast cancer**

Authors: Jilong Guo, Guohua Gong, Bin Zhang

**Supplementary figure 1.** Analysis of EGFR expression in MDA-MB-231 and MCF7 cells by Western blot. (A) Introduction of miR-539 reduced the endogenous EGFR protein expression in MDA-MB-231 and MCF7 cells. (B) The levels of EGFR was markedly increased in both MDA-MB-231 and MCF7 cells after transfected with pcDNA3.1-EGFR plasmid.

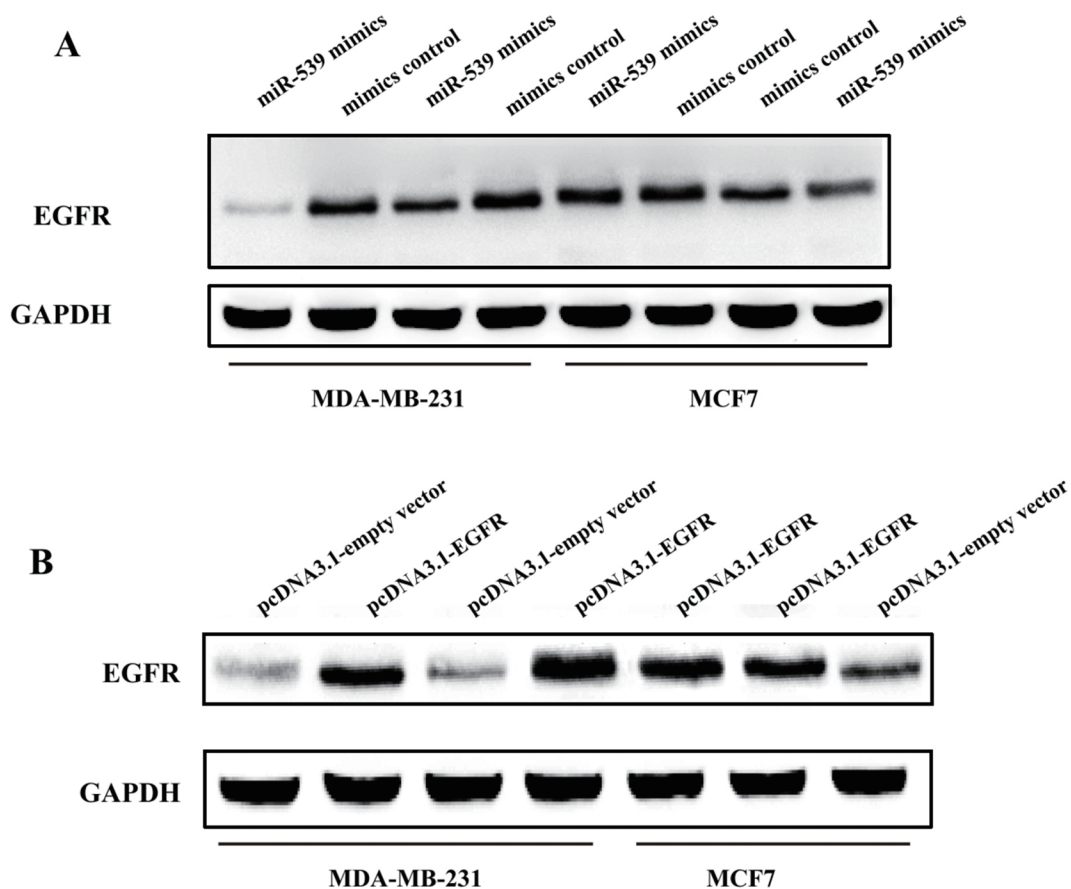

Supplement: 41598_2018_20431_MOESM1_ESM.pdf [file 41598_2018_20431_MOESM1_ESM.pdf]
